# Supplementary material for: Detecting Airborne Pollen Using an Automatic, Real-Time Monitoring System: Evidence from Two Sites
Source: MDPI journal article supplement (doi:10.3390/ijerph19042471), 2022-02-21
Supplement: s1 [file s1]

## SUPPLEMENTARY MATERIAL LEGENDS

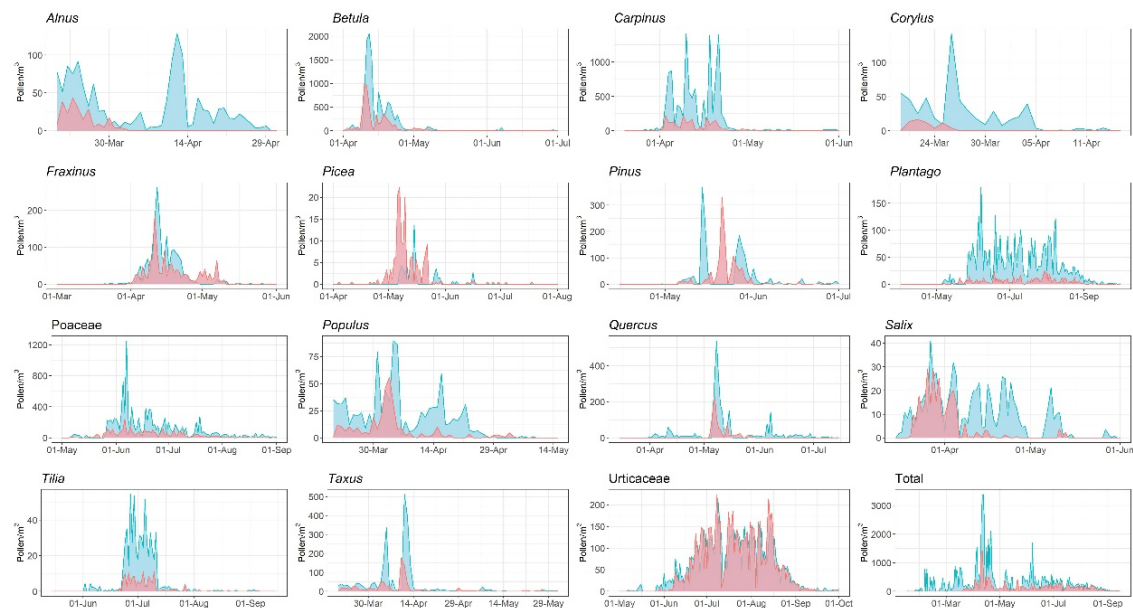

**Figure S1.** Seasonality of pollen concentrations monitored by the LFU PoMo (blue colour), after manually classified, and the Hirst-type system (red colour), for the 15 most abundant pollen types, and their total pollen load, in Augsburg.

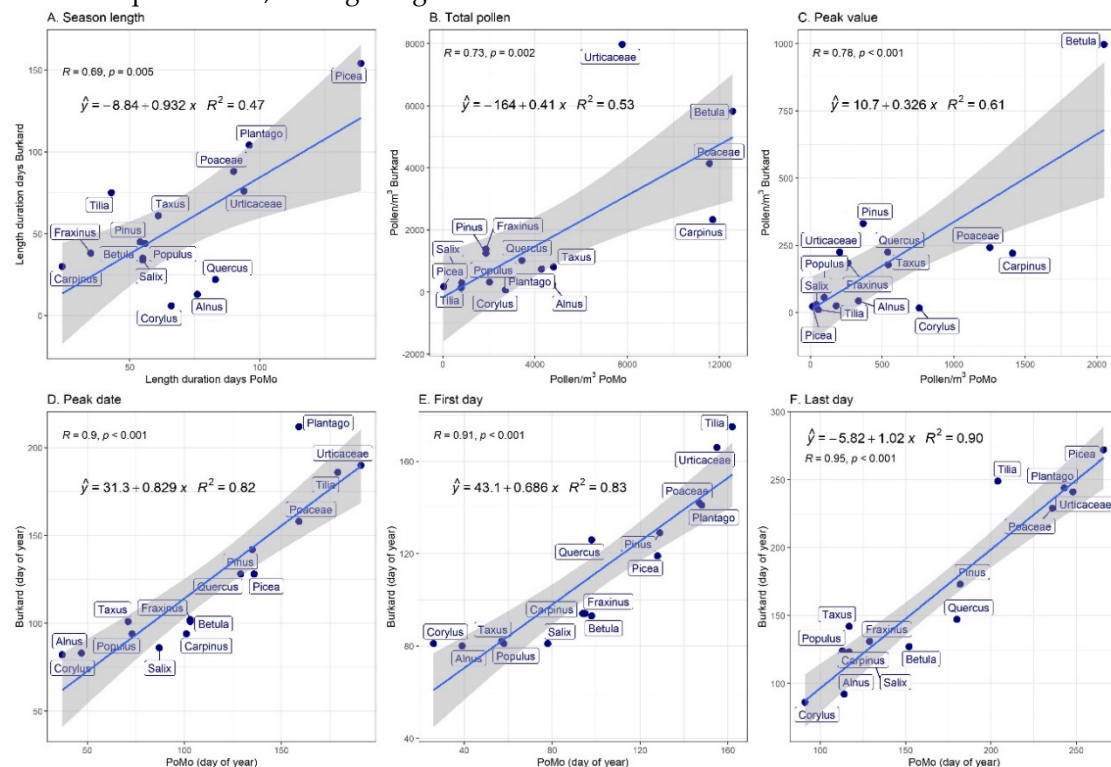

**Figure S2.** Linear regressions (blue lines) between LFU PoMo, after manually classified, and Hirst-type main pollen season traits are shown, with 95% confidence intervals (grey area). The coefficient of determination ( $R^2$ ) and Pearson's correlation coefficient ( $r$ ) are also shown.

- A. The pollen season length (duration between the first and the last pollen day)
- B. The Annual Pollen Integral (cumulative pollen concentration per year)
- C. Peak daily pollen concentration (maximum concentration per year)
- D. Date on which the maximum concentration per year was observed
- E. The date on which the first pollen was observed in the year
- F. The date on which the last pollen was observed in the year

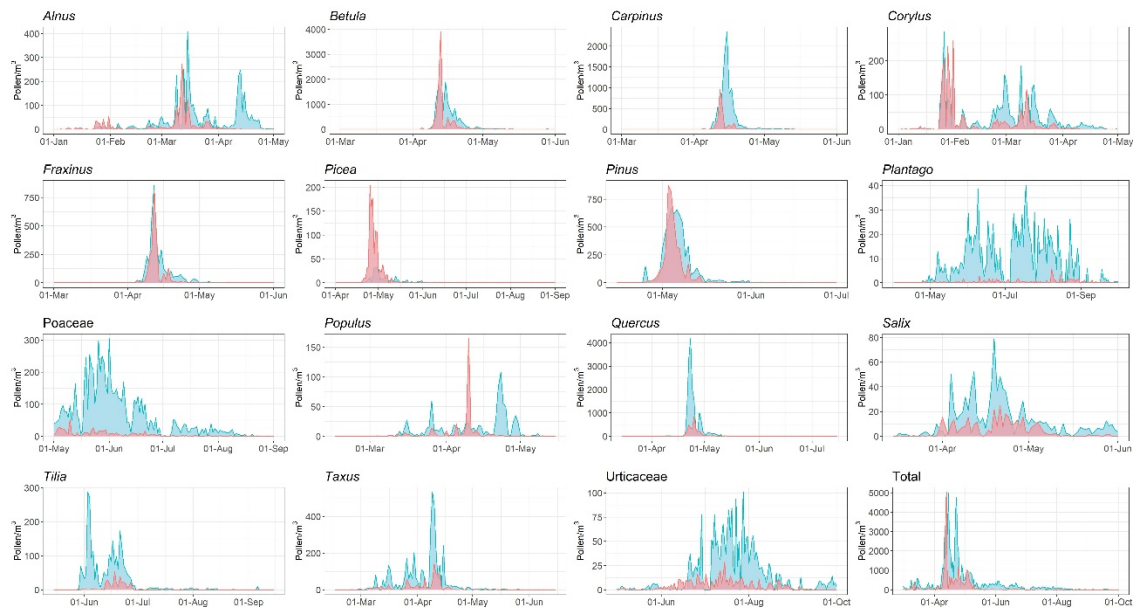

**Figure S3.** Seasonality of pollen concentrations monitored by the IEM PoMo (blue colour), after manually classified, and the Hirst-type system (red colour), for the 15 most abundant pollen types, and their total pollen load, in Augsburg.

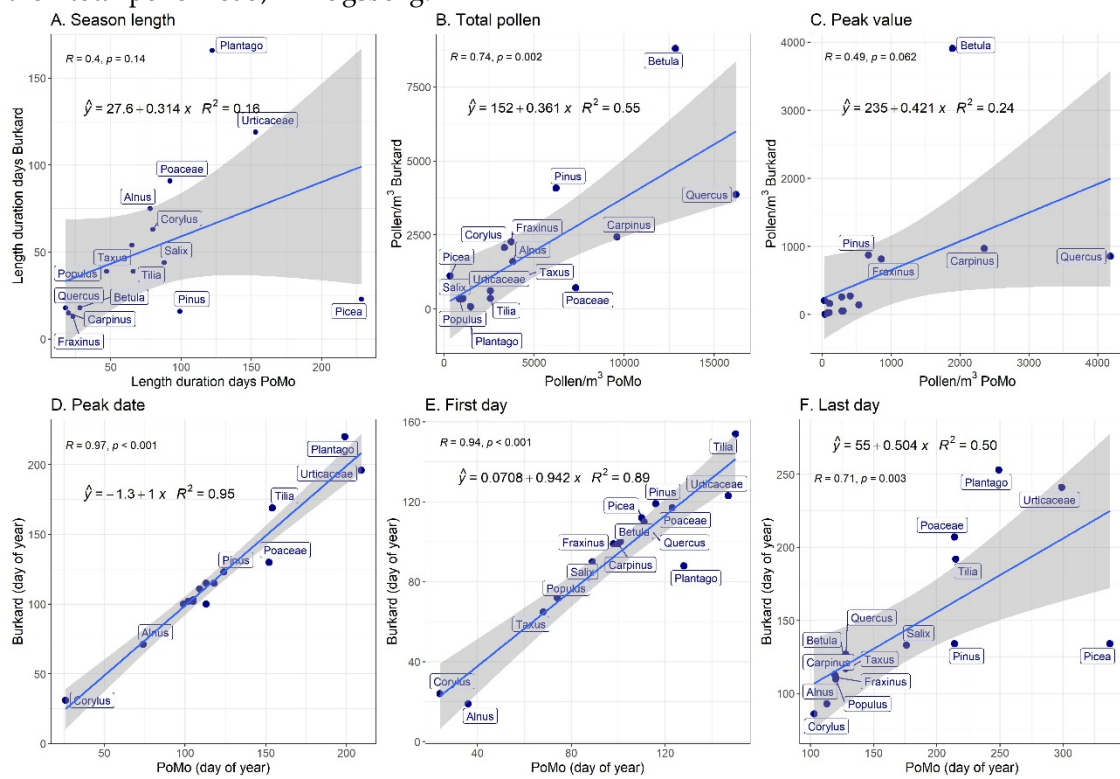

**Figure S4.** Linear regressions (blue lines) between IEM PoMo, after manually classified, and Hirst-type main pollen season traits are shown, with 95% confidence intervals (grey area). The coefficient of determination ( $R^2$ ) and Pearson's correlation coefficient ( $r$ ) are also shown.

- The pollen season length (duration between the first and the last pollen day)
- The Annual Pollen Integral (cumulative pollen concentration per year)
- Peak daily pollen concentration (maximum concentration per year)
- Date on which the maximum concentration per year was observed
- The date on which the first pollen was observed in the year
- The date on which the last pollen was observed in the year
